# Supplementary material for: Temperature Effects on Recruitment and Individual Growth of Two Antagonistic Fish Species, Perch Perca fluviatilis and Roach Rutilus rutilus, from a Climate Change Perspective
Source: MDPI journal article supplement (doi:10.3390/fishes8060295), 2023-06-01
Supplement: s1 [file s1]

Table S1. Linear model of water temperature affected by air temperature and location.

|                                                            | <b>Coefficients</b> | <b>S.E.</b> | <b><i>t</i></b> | <b><i>p</i></b> |
|------------------------------------------------------------|---------------------|-------------|-----------------|-----------------|
| Intercept (Bergsjøen)                                      | 7.09                | 0.23        | 30.49           | < 0.001         |
| Air temperature                                            | 0.72                | 0.015       | 48.95           | < 0.001         |
| Lake Harasjøen                                             | 0.869               | 0.168       | 5.16            | < 0.001         |
| Lake Rasen                                                 | 0.189               | 0.191       | 0.99            | > 0.05          |
| Lake Rokosjøen                                             | 0.238               | 0.168       | 1.42            | > 0.05          |
| $R^2 = 0.660$ , $F = 620$ , $d.f. = 4$ , 1279, $p < 0.001$ |                     |             |                 |                 |

Table S2. Non-parametric Spearman correlation tests between relative year-class strength (YCS) and perch and roach and monthly mean air temperatures.

| <b>Sample</b>  | <b><math>X_1</math></b>          | <b><math>X_2 = T_{\text{JulAug}}</math></b> | <b><math>X_2 = 1 + \text{perch abundance.}</math></b> |
|----------------|----------------------------------|---------------------------------------------|-------------------------------------------------------|
| Lake Bergsjøen | $YCS_{\text{Perch}}$ 1993        | $\rho = 0.929$ ,<br>$p < 0.01$              |                                                       |
| Lake Bergsjøen | $YCS_{\text{Perch}}$ 2006 - 2009 | $\rho = -0.286$ ,<br>$p > 0.05$             |                                                       |
| Lake Rasen     | $YCS_{\text{Perch}}$             | $\rho = 0.929$ ,<br>$p < 0.01$              |                                                       |
| Lake Harasjøen | $YCS_{\text{Perch}}$             | $\rho = 0.834$ ,<br>$p < 0.001$             |                                                       |
| Lake Rokosjøen | $YCS_{\text{Perch}}$             | $\rho = 0.642$ ,<br>$p < 0.01$              |                                                       |
| Lake Harasjøen | $YCS_{\text{Roach}}$             | $\rho = 0.318$ ,<br>$p > 0.05$              | $\rho = -0.055$ ,<br>$p > 0.05$                       |
| Lake Rokosjøen | $YCS_{\text{Roach}}$             | $\rho = 0.467$ ,<br>$p > 0.05$              | $\rho = -0.406$ ,<br>$p > 0.05$                       |
